# Supplementary material
Source: Springer Nature journal article supplement (https://www.springermedizin.de/resource/supplementary/13054_2005_3674_MOESM3_ESM.pdf/9721026)

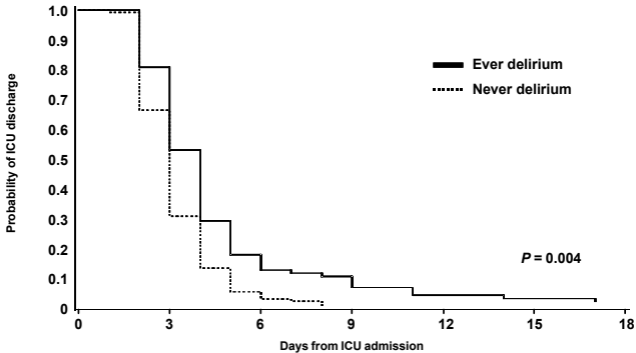

| Group          | No. at risk | 0   | 3   | 6  | 9 | 12 | 15 |
|----------------|-------------|-----|-----|----|---|----|----|
| Ever delirium  | 125         | 125 | 101 | 20 | 8 | 3  | 2  |
| Never delirium | 135         | 135 | 88  | 6  | 0 | 0  | 0  |

Supplement: MOESM3 [file 9721026]
